# Supplementary material for: In-depth transcriptomic analysis of human retina reveals molecular mechanisms underlying diabetic retinopathy
Source: Sci Rep. 2021 May 18;11:10494. doi: 10.1038/s41598-021-88698-3 (PMC8131353; doi:10.1038/s41598-021-88698-3)
Supplement: Supplementary file 2 — Supplementary Table 1. [file 41598_2021_88698_MOESM2_ESM.xlsx]

## Sheet: TableS1
sampleID	sampleNumber	donor	gender	age	BMI	duration_diabetes	duration_diabetes_min	duration_diabetes_min_unit	diabetes_medication	other_medication	comorbidities	pathology_note	note_other	ETDRS_score	disease_group	DME	disease_group_dme	disease_group_detailed	eye	sample_site	sample_group	post_mortem_interval	post_mortem_interval_unit	buffer	buffer_volume	buffer_volume_unit	ammount_cells	ammount_cells_unit	RIN
sample_01	1	16	female	80	30.2313	n/a	0	years	n/a	ASA, levoxyl, verpamil, aldactone, nasonex nasal srapy, vicodin, toprol, mirtazapine, pulmicort puff (glucocorticoid), albuterol inhaler 2 puff, home oxygen, Mg tablets,	hypertension (HTN), congestive heart failure (CHF), asthma, history of Vfib with MI x 2 s/p AICD placement in 1999. Atrial fib, hypothyroidism	pseudophakia with YAG		0	Control	FALSE	Control	Control	OD	Macula	Control_Macula	285	min	Water	16.95	ul	118	ng/ul	6.2
sample_02	2	31	male	73	30.7258	n/a	0	years	n/a	isoptin, imdur, prozac, trazodone, ASA	CAD, s/p coronary angioplasties, HTN, COPD, hyperlipidemia, anxiety, depression, s/p appendectomy, s/p hemorrhoidectomy.	cataracts		0	Control	FALSE	Control	Control	OD	Macula	Control_Macula	354	min	Water	21.51	ul	93	ng/ul	6.3
sample_03	3	41	female	73	28.2427	n/a	0	years	n/a	levoxyl, atenolol, avapro, dilantin, DDAVP, omepraxole, MVI, ASA	breast CA with brain mets, DI, HTN, hypothyroidism, GRD	cataracts		0	Control	FALSE	Control	Control	OD	Macula	Control_Macula	320	min	Water	16.26	ul	123	ng/ul	4.7
sample_04	4	25	male	81	24.9586	n/a	0	years	n/a	atenolol, DECADRON (STEROIDS), paroxetine, ASA, Aricept, folic acid	metastatic lung CA, HTN, depression	cataract extraction		0	Control	FALSE	Control	Control	OD	Macula	Control_Macula	331	min	Water	19.23	ul	104	ng/ul	7.4
sample_05	5	19	female	82	32.383	n/a	0	years	n/a	Plavix, demadex, levothyroxine, folic acid, metoprolol, amlodipine, hydralzine, ASA, fosamax, isosorbide, Douvent nebulizer, PULMICORT INHALER,	CAD, s/p MI, angina, CHF, COPD, pulmonary HTN, hypothyroidism, breast CA, osteoprosis/OA, vocal cord paralysis, RA, PUD, vitiligo, HTN	pseudophakia, Fuchâ€™s endo dystrophy, choroidal nevi		0	Control	FALSE	Control	Control	OD	Macula	Control_Macula	305	min	Water	14.93	ul	134	ng/ul	8.3
sample_06	6	11	female	84	29.8506	n/a	0	years	n/a	unknown	ovarian CA, mitral regurg, choesystectomy, tonsillectomy	corneal stromal scar, cataract		0	Control	FALSE	Control	Control	OS	Macula	Control_Macula	325	min	Water	10.1	ul	198	ng/ul	7.8
sample_07	7	2	male	63	42.17	n/a	0	years	n/a	Heparin, lasix, lactulose, protonix, paroxetine, vitamin K	liver cirrhosis, alpha-1-AT deficiency diagnosed 2 yrs ago, UTI, HTN, nephrolithiasis, OSA on CPAP at night	none		0	Control	FALSE	Control	Control	OD	Macula	Control_Macula	343	min	Water	13.42	ul	149	ng/ul	7.8
sample_08	8	37	female	80	23.8012	n/a	0	years	n/a	Protonix, methotrexate, prednisone, folic acid, captopril, Fosamax, calcium	failure to thrive, COPD, hypertension arthritis, osteoporosis, coronary artery disease, CHF, fractures	corneal dystrophy		0	Control	FALSE	Control	Control	OD	Macula	Control_Macula	280	min	Water	21.05	ul	95	ng/ul	7.8
sample_09	9	1	male	70	26.26	n/a	0	years	n/a	laspofunginin, posacandozole, neupogen, heparin, coumadin, zosyn, vancomycin	ulcerative colitis, bone marrow failure, rhizopus lung infection, refractory anemia with myelodysplasia, pulmonary embolus, HTN, myelodysplasia, dyslipidemia	pterygium removed, glasses		0	Control	FALSE	Control	Control	OS	Macula	Control_Macula	279	min	Water	20.41	ul	98	ng/ul	5
sample_10	10	24	female	78	27.3	n/a	0	years	n/a	Haldol, lorazepam, melatonin, nystatin, omeprazole, Zofran, oxycodone	metastatic duodenal cancer, chemotherapy, small bowel obstruction, hernia repair, hyponatremia, hypertension hyperlipidemia,	none		0	Control	FALSE	Control	Control	OD	Macula	Control_Macula	283	min	Water	11.9	ul	168	ng/ul	5.7
sample_11	11	16	female	80	30.2313	n/a	0	years	n/a	ASA, levoxyl, verpamil, aldactone, nasonex nasal srapy, vicodin, toprol, mirtazapine, pulmicort puff (glucocorticoid), albuterol inhaler 2 puff, home oxygen, Mg tablets,	hypertension (HTN), congestive heart failure (CHF), asthma, history of Vfib with MI x 2 s/p AICD placement in 1999. Atrial fib, hypothyroidism	pseudophakia with YAG		0	Control	FALSE	Control	Control	OD	Periphery	Control_Periphery	285	min	Water	12.05	ul	166	ng/ul	8.6
sample_12	12	1	male	70	26.26	n/a	0	years	n/a	laspofunginin, posacandozole, neupogen, heparin, coumadin, zosyn, vancomycin	ulcerative colitis, bone marrow failure, rhizopus lung infection, refractory anemia with myelodysplasia, pulmonary embolus, HTN, myelodysplasia, dyslipidemia	pterygium removed, glasses		0	Control	FALSE	Control	Control	OS	Periphery	Control_Periphery	279	min	Water	21.3	ul	94	ng/ul	8.1
sample_13	13	25	male	81	24.9586	n/a	0	years	n/a	atenolol, DECADRON (STEROIDS), paroxetine, ASA, Aricept, folic acid	metastatic lung CA, HTN, depression	cataract extraction		0	Control	FALSE	Control	Control	OD	Periphery	Control_Periphery	331	min	Water	13.33	ul	150	ng/ul	6.2
sample_14	14	19	female	82	32.383	n/a	0	years	n/a	Plavix, demadex, levothyroxine, folic acid, metoprolol, amlodipine, hydralzine, ASA, fosamax, isosorbide, Douvent nebulizer, PULMICORT INHALER,	CAD, s/p MI, angina, CHF, COPD, pulmonary HTN, hypothyroidism, breast CA, osteoprosis/OA, vocal cord paralysis, RA, PUD, vitiligo, HTN	pseudophakia, Fuchâ€™s endo dystrophy, choroidal nevi		0	Control	FALSE	Control	Control	OD	Periphery	Control_Periphery	305	min	Water	13.16	ul	152	ng/ul	6.5
sample_15	15	11	female	84	29.8506	n/a	0	years	n/a	unknown	ovarian CA, mitral regurg, choesystectomy, tonsillectomy	corneal stromal scar, cataract		0	Control	FALSE	Control	Control	OD	Periphery	Control_Periphery	325	min	Water	21.28	ul	94	ng/ul	4.7
sample_16	16	2	male	63	42.17	n/a	0	years	n/a	Heparin, lasix, lactulose, protonix, paroxetine, vitamin K	liver cirrhosis, alpha-1-AT deficiency diagnosed 2 yrs ago, UTI, HTN, nephrolithiasis, OSA on CPAP at night	none		0	Control	FALSE	Control	Control	OD	Periphery	Control_Periphery	343	min	Water	8.51	ul	235	ng/ul	8.1
sample_17	17	37	female	80	23.8012	n/a	0	years	n/a	Protonix, methotrexate, prednisone, folic acid, captopril, Fosamax, calcium	failure to thrive, COPD, hypertension arthritis, osteoporosis, coronary artery disease, CHF, fractures	corneal dystrophy		0	Control	FALSE	Control	Control	OD	Periphery	Control_Periphery	280	min	Water	13.42	ul	149	ng/ul	8.1
sample_18	18	39	female	70		n/a	0	years	n/a	Tylenol, haldol, ativan, morphine,mylicon	Cholangiocarcinoma, sepsis, diabetes type II, coronary artery disease, diverticulitis, liver disease,	none		0	Control	FALSE	Control	Control	OS	Periphery	Control_Periphery	295	min	Water	17.7	ul	113	ng/ul	7.6
sample_19	19	7	male	80		n/a	0	years	n/a	Levaquin, zosyn, Flomax, hydrochlorothiazide, Compazine, lorazepam, nystatin, warfarin, gabapentin, librax, tarceva,	metastatic adenocarcinoma of lung, lung cancer, pulmonary embolism, Waldenstrom macroglobulinemia, hypertension, familial tremor, gastroesophageal disease, asthma, recurring pneumonia	cataract extraction		0	Control	FALSE	Control	Control	OS	Periphery	Control_Periphery	356	min	Water	7.25	ul	275.7	ng/ul	7
sample_20	20	24	female	78	27.3	n/a	0	years	n/a	Haldol, lorazepam, melatonin, nystatin, omeprazole, Zofran, oxycodone	metastatic duodenal cancer, chemotherapy, small bowel obstruction, hernia repair, hyponatremia, hypertension hyperlipidemia,	none		0	Control	FALSE	Control	Control	OD	Periphery	Control_Periphery	283	min	Water	10.81	ul	185	ng/ul	5.5
sample_21	21	23	female	88	31.0652	10 yrs	10	years	none	atenolol/chlorthalidone, monopril, synthroid, ambien, tylenol .3, amitriptyline	DM, HTN, hypothyroidism, depression CHF, osteoarthritis	cataracts, Fuchs., glaucoma suspect, corneal dystrophy		10	Diabetic	FALSE	Diabetic	Diabetic	OD	Macula	Diabetic_Macula	348	min	Water	19.42	ul	103	ng/ul	5.9
sample_22	22	33	male	84	27.0435	>12 years	12	years	glyburide, insulin	atenolol, lisinopril	pancreatic cancer, dyspnea from pleural effusion, DM, Afib.	cataract		10	Diabetic	FALSE	Diabetic	Diabetic	OD	Macula	Diabetic_Macula	360	min	Water	20.41	ul	98	ng/ul	6.6
sample_23	23	15	male	77	36.4715	>25 years	25	years	Glimepiride, Novolin	isosorbide, metoprolol, allopurinol, lisinopril, lasix, ASA, Crestor, Zetia, sulfasalazine, digoxin	ischemic cardiomyopathy, CAD, aortic stenosis, DM, renal insufficiency, hyperlipidemia, HTN, TIA, spinal stenosis, ulcerative colitis, left ulnar palsy,	none		10	Diabetic	FALSE	Diabetic	Diabetic	OD	Macula	Diabetic_Macula	331	min	Water	9.22	ul	217	ng/ul	8.4
sample_24	24	36	male	80	28.6939	9 years	9	years	Insulin (Humalin)	digoxin, prednisone, coumarin	cholecystectomy, prostrate surgery	PVD, cataracts		10	Diabetic	FALSE	Diabetic	Diabetic	OD	Macula	Diabetic_Macula	293	min	Water	31.3	ul	64	ng/ul	8.5
sample_25	25	18	female	74	22.8603	7 yrs	7	years	Glimepiride, metformin	prednisone, lisinopril/HCTZ, bisoprolol	paratracheal mass, lupus, autoimmune hepatitis, NIDDM, HTN, high creatinine levels.	cataracts		10	Diabetic	FALSE	Diabetic	Diabetic	OS	Macula	Diabetic_Macula	314	min	Water	18.35	ul	109	ng/ul	8.3
sample_26	26	35	female	84	28.7272	8 years	8	years	metformin	allopurinol, aspirin, ferrous sulfate, neurontin, omeprazole, KCl, PreserVision, Restasis, Demadex, Tyvaso inhaler, Zetia	breast CA, CHF, A-fib, HTN, pulmonary artery fibrillation/flutter-unsuccessful R atrial ablation; non ischsmic dilated cardiomyopathy, hysterectomy 1992; bowel obstruction	asteroid hyalosis, choroiodal nevus		10	Diabetic	FALSE	Diabetic	Diabetic	OS	Macula	Diabetic_Macula	343	min	Water	18.52	ul	108	ng/ul	8.1
sample_27	27	10	female	97	26.306	>15 years	15	years	none	Plavix, metoprolol,dyrenium, gabapentin, multivitamin	DM, HTN, hypothyroidism, depression CHF, osteoarthritis	Phaco, trabeculectomy		10	Diabetic	FALSE	Diabetic	Diabetic	OD	Macula	Diabetic_Macula	348	min	Water	44.15	ul	45.3	ng/ul	5.4
sample_28	28	32	female	90	30.8936	unknown		years	metformin (1000 mg)	mapap	paroxysmal a-fib on chronic anticoagulation, mild to moderate mitral regurgitation and stenosis, IDDM, HTN, CAD.	hypertensive retinopathy		10	Diabetic	FALSE	Diabetic	Diabetic	OS	Macula	Diabetic_Macula	350	min	Water	24.39	ul	82	ng/ul	6.2
sample_29	29	12	female	54	45.8035	7 yrs	7	years	humalog, glucophage, lantus	fentanyl, Haldol, heparin, Ativan, levothyroxin, lisinopril, protonix, pantoprazole	acute chronic kidney injury,acute hepatic encephalopathy, heart-to-heart cirrhosis of liver, hypertension, hypothyroidism, obesity, pneumonia, diabetes mellitus type II, IDDM	none	A1C= 5.9	10	Diabetic	FALSE	Diabetic	Diabetic	OS	Macula	Diabetic_Macula	321	min	Water	11.36	ul	176	ng/ul	8.6
sample_30	30	20	male	86	30.437	16 years	16	years	metformin	aspirin, levothyroxine,cloidogrel	none noted	AMD, cataract extraction, PVD		10	Diabetic	FALSE	Diabetic	Diabetic	OS	Macula	Diabetic_Macula	322	min	Water	21.05	ul	95	ng/ul	5.9
sample_31	31	23	female	88	31.0652	10 yrs	10	years	none	atenolol/chlorthalidone, monopril, synthroid, ambien, tylenol .3, amitriptyline	DM, HTN, hypothyroidism, depression CHF, osteoarthritis	cataracts, Fuchs., glaucoma suspect, corneal dystrophy		10	Diabetic	FALSE	Diabetic	Diabetic	OD	Periphery	Diabetic_Periphery	348	min	Water	20.83	ul	96	ng/ul	6.6
sample_32	32	33	male	84	27.0435	>12 years	12	years	glyburide, insulin	atenolol, lisinopril	pancreatic cancer, dyspnea from pleural effusion, DM, Afib.	cataract		10	Diabetic	FALSE	Diabetic	Diabetic	OD	Periphery	Diabetic_Periphery	360	min	Water	17.86	ul	112	ng/ul	4.8
sample_33	33	15	male	77	36.4715	>25 years	25	years	Glimepiride, Novolin	isosorbide, metoprolol, allopurinol, lisinopril, lasix, ASA, Crestor, Zetia, sulfasalazine, digoxin	ischemic cardiomyopathy, CAD, aortic stenosis, DM, renal insufficiency, hyperlipidemia, HTN, TIA, spinal stenosis, ulcerative colitis, left ulnar palsy,	none		10	Diabetic	FALSE	Diabetic	Diabetic	OD	Periphery	Diabetic_Periphery	331	min	Water	16.81	ul	119	ng/ul	8.3
sample_34	34	42	male	77		unknown		years	Lantus insulin, Humalog insulin	fish oil, lasix, Avapro, isosorbide, metroprolol XL, omeprazole, KCl, Crestor, Vit D, nitroglycerin prn	IDDM type 2, adematous colon polyp, hypercholesterolemia, HTN, A-fib w/ ablation, CAD, back pain, stroke, kidney failure, acid reflux, arthritis, atrial flutter, GERD, cataracts, tobacco use.	IOL, drusen		10	Diabetic	FALSE	Diabetic	Diabetic	OS	Periphery	Diabetic_Periphery	331	min	Water	20	ul	100	ng/ul	7
sample_35	35	10	female	97	26.306	>15 years	15	years	none	Plavix, metoprolol,dyrenium, gabapentin, multivitamin	DM, HTN, hypothyroidism, depression CHF, osteoarthritis	Phaco, trabeculectomy		10	Diabetic	FALSE	Diabetic	Diabetic	OD	Periphery	Diabetic_Periphery	314	min	Water	25.64	ul	78	ng/ul	8.1
sample_36	36	34	female	79		>12 yrs	12	years	metformin	allopurinol, aspirin, ferrous sulfate, neurontin, omeprazole, KCl, PreserVision, Restasis, Demadex, Tyvaso inhaler, Zetia	heart failure, atrial flutter, chronic renal insufficiency, pulmonary hypertension, Sjogrenâ€™s syndrome, DM, osteoarthritis	Sjogrenâ€™s, Fuchsâ€™, early ARMD	A1C between 6 and 7 over the years	10	Diabetic	FALSE	Diabetic	Diabetic	OD	Periphery	Diabetic_Periphery	356	min	Water	20.62	ul	97	ng/ul	9.2
sample_37	37	12	female	54	45.8035	7 yrs	7	years	humalog, glucophage, lantus	fentanyl, Haldol, heparin, Ativan, levothyroxin, lisinopril, protonix, pantoprazole	acute chronic kidney injury,acute hepatic encephalopathy, heart-to-heart cirrhosis of liver, hypertension, hypothyroidism, obesity, pneumonia, diabetes mellitus type II, IDDM	none	A1C= 5.9	10	Diabetic	FALSE	Diabetic	Diabetic	OS	Periphery	Diabetic_Periphery	348	min	Water	12.74	ul	157	ng/ul	8.2
sample_38	38	32	female	90	30.8936	unknown		years	metformin (1000 mg)	mapap	paroxysmal a-fib on chronic anticoagulation, mild to moderate mitral regurgitation and stenosis, IDDM, HTN, CAD.	hypertensive retinopathy		10	Diabetic	FALSE	Diabetic	Diabetic	OD	Periphery	Diabetic_Periphery	350	min	Water	32.3	ul	62	ng/ul	8.6
sample_39	39	10	female	97	26.306	>15 years	15	years	none	Plavix, metoprolol,dyrenium, gabapentin, multivitamin	DM, HTN, hypothyroidism, depression CHF, osteoarthritis	Phaco, trabeculectomy		10	Diabetic	FALSE	Diabetic	Diabetic	OD	Periphery	Diabetic_Periphery	321	min	Water	13.07	ul	153	ng/ul	7.8
sample_40	40	20	male	86	30.437	16 years	16	years	metformin	aspirin, levothyroxine,cloidogrel	none noted	AMD, cataract extraction, PVD		10	Diabetic	FALSE	Diabetic	Diabetic	OS	Periphery	Diabetic_Periphery	322	min	Water	16.67	ul	120	ng/ul	7
sample_41	41	6	female	65	15.8	unkown		years	insulin (lantus, humalog)	allopurinol, ASA, lipitor, plavix, lanoxin, furosemide, indomethacin, isosorbide, synthroid, toprol, nitroclycerin, altace	CAD, ischemic cardiomyopathy, chronic kidney dz, HTN, anemia, PVD, hypothyroidism, DM type 2, hyperlipidemia, asthma.	iris neovascularization		53	NPDR	FALSE	NPDR	NPDR	OD	Macula	NPDR_Macula	331	min	Water	7.4	ul	270	ng/ul	6.9
sample_42	42	22	male	84	25.9878	>12 years	12	years	glipizide, pioglitazone	Fosamax, aspirin, atorvastatin, calcium, cefaclor, citalopram, furosemide, gabapentin, insulin, levothyroxine, mitazapine, omeprazole, polyethilene glycol, repaglinide, triamcinolone	Diabetes mellitus type II, hypothyroidism, hyperlipidemia	Glaucoma suspect, Cataract extraction		35	NPDR	FALSE	NPDR	NPDR	OD	Macula	NPDR_Macula	355	min	Water	32.26	ul	62	ng/ul	7.4
sample_43	43	3	male	89	30.1793	>25 yrs	25	years	Insulin	allopurinol, amlopidine, asperin, atenolol, gabapentin, omeprazole, furosemide, lorazepam	DM type 2, IDDM, chronic kidney disease, HTN, prostate adeno CA, melanoma, gout, hyperlipidemia, hypercalcemia.	cateract extraction	Toe amputation 1 yr prior to death	20	NPDR	FALSE	NPDR	NPDR	OD	Macula	NPDR_Macula	321	min	Water	28.57	ul	70	ng/ul	8.2
sample_44	44	40	male	69	30.9255	13 yrs	13	years	Insulin	Furosemide, spironolactone, methotrexate, aranesp	HTN, ascites of unclear etiology, psoriasis, ostheoarthritis.	macular pucker		35	NPDR	FALSE	NPDR	NPDR	OD	Macula	NPDR_Macula	360	min	Water	11.56	ul	173	ng/ul	7.9
sample_46	46	28	male	97	24.4	5 yrs	5	years	glipizide	carvedilol, warfarin, cozaar, digoxin, diltiazem, flector, fluticasone inhalation, furosemide, januvia, KCl, neurontin, oxycontin, valium, Vicodin, Vit C, Vit E	PVD, chronic left foot ischemia and gangrenous tissue, CHF, suicidal thoughts, chronic severe pain, A-fib, BPH, HTN, chronic back pain, vertigo, constipation	cataract extraction, PVD		20	NPDR	FALSE	NPDR	NPDR	OD	Macula	NPDR_Macula	348	min	Water	9.57	ul	209	ng/ul	7.3
sample_47	47	30	male	81	26.9645	40 yrs	40	years	insulin	hydralazine, Metalozone	colon cancer with pulmonary adn bladder mets, bladder bleeding, bladder clots and occlusion, heart disease, popliteal aneurysm, HTN, CAD in native artery, chronic systolic CHF, CKD, acute on chronic combined systolic and diastolic heart failure, PE, A-fib, gross hematuria, urinary tract obstruction, hypotension, slow transit constipation.	PVD		20	NPDR	FALSE	NPDR	NPDR	OD	Macula	NPDR_Macula	358	min	Water	15.5	ul	129	ng/ul	5.4
sample_48	48	21	male	62	63.2687	19 years	19	years	insulin	clonidine, fluoxetine, gabapentin, hydrocodone, simvastatin, omeprazole, lisinopril, cephalexin, tirosint, diltiazem, hydralazine	type I diabetes, hypothyroidism, high cholesterol, hypertension, neuropathy	glaucoma suspect due to large cups, but not frank glaucoma		43	NPDR	FALSE	NPDR	NPDR	OS	Macula	NPDR_Macula	329	min	Water	16	ul	125	ng/ul	8.7
sample_49	49	43	female	66	42.0968	>15 years	15	years	None	unknown	diabetes type 2, cardiomyopathy peripheral artery disease, hypertension, CAD, osteoarthritis, atrial fibrillation, depression, anxiety, history of gangrene		This donor had very limited health care	53	NPDR	FALSE	NPDR	NPDR	OD	Macula	NPDR_Macula	286	min	Water	35.1	ul	57	ng/ul	8.1
sample_50	50	17	male	90	26.254	unknown		years	glimepiride	atenolol, atorvastatin, Azor, furosemide	type II diabetes mellitus, acute pulmonary edema, renal failure, gastrointestinal hemorrhage,	lattice degeneration, vitreous detachment, mild ARMD, pseudophakia		53	NPDR	FALSE	NPDR	NPDR	OD	Macula	NPDR_Macula	297	min	Water	14.29	ul	140	ng/ul	6.2
sample_51	51	6	female	65	15.8	unkown		years	insulin (lantus, humalog)	allopurinol, ASA, lipitor, plavix, lanoxin, furosemide, indomethacin, isosorbide, synthroid, toprol, nitroclycerin, altace	CAD, ischemic cardiomyopathy, chronic kidney dz, HTN, anemia, PVD, hypothyroidism, DM type 2, hyperlipidemia, asthma.	iris neovascularization		53	NPDR	FALSE	NPDR	NPDR	OD	Periphery	NPDR_Periphery	331	min	Water	14.71	ul	136	ng/ul	7.6
sample_52	52	22	male	84	25.9878	>12 years	12	years	glipizide, pioglitazone	Fosamax, aspirin, atorvastatin, calcium, cefaclor, citalopram, furosemide, gabapentin, insulin, levothyroxine, mitazapine, omeprazole, polyethilene glycol, repaglinide, triamcinolone	Diabetes mellitus type II, hypothyroidism, hyperlipidemia	Glaucoma suspect, Cataract extraction		35	NPDR	FALSE	NPDR	NPDR	OD	Periphery	NPDR_Periphery	355	min	Water	21.05	ul	95	ng/ul	8.2
sample_53	53	3	male	89	30.1793	>25 yrs	25	years	Insulin	allopurinol, amlopidine, asperin, atenolol, gabapentin, omeprazole, furosemide, lorazepam	DM type 2, IDDM, chronic kidney disease, HTN, prostate adeno CA, melanoma, gout, hyperlipidemia, hypercalcemia.	cateract extraction	Toe amputation 1 yr prior to death	20	NPDR	FALSE	NPDR	NPDR	OD	Periphery	NPDR_Periphery	321	min	Water	32.26	ul	62	ng/ul	9.1
sample_54	54	40	male	69	30.9255	13 yrs	13	years	Insulin	Furosemide, spironolactone, methotrexate, aranesp	HTN, ascites of unclear etiology, psoriasis, ostheoarthritis.	macular pucker		35	NPDR	FALSE	NPDR	NPDR	OS	Periphery	NPDR_Periphery	360	min	Water	32.79	ul	61	ng/ul	7
sample_55	55	38	male	85	22.9106	17 yrs	17	years	glipizide	Ranexa, hydralazine, tranexamic acid, Ativan, Lasix, potassium chloride, metoprolol, nitroglycerin, imdur, multivitamin, Colace, Motrin, Haldol, roxanol, Zocor, trazodone, allopurinol, digoxin, torsemide	Ischemic cardiomyopathy, CHF, CAD s/p CABG, hyperlipidemia, renal insufficiency/failure, gout, cerebrovascular disease and carotid bruit, HTN, chronic back discomfort, spinal stenosis, atrial fibrillation, heart block with prior pacemaker implantation, anemia, peripheral vascular disease, ex-smoker	cataract extraction, PVD	allopurinol, amlopidine, asperin, atenolol, gabapentin, omeprazole, furosemide, lorazepam,	20	NPDR	FALSE	NPDR	NPDR	OD	Periphery	NPDR_Periphery	326	min	Water	10.7	ul	187	ng/ul	7.5
sample_56	56	28	male	97	24.4	5 yrs	5	years	glipizide	carvedilol, warfarin, cozaar, digoxin, diltiazem, flector, fluticasone inhalation, furosemide, januvia, KCl, neurontin, oxycontin, valium, Vicodin, Vit C, Vit E	PVD, chronic left foot ischemia and gangrenous tissue, CHF, suicidal thoughts, chronic severe pain, A-fib, BPH, HTN, chronic back pain, vertigo, constipation	cataract extraction, PVD		20	NPDR	FALSE	NPDR	NPDR	OD	Periphery	NPDR_Periphery	348	min	Water	12.99	ul	154	ng/ul	7.1
sample_57	57	30	male	81	26.9645	40 yrs	40	years	insulin	hydralazine, Metalozone	colon cancer with pulmonary adn bladder mets, bladder bleeding, bladder clots and occlusion, heart disease, popliteal aneurysm, HTN, CAD in native artery, chronic systolic CHF, CKD, acute on chronic combined systolic and diastolic heart failure, PE, A-fib, gross hematuria, urinary tract obstruction, hypotension, slow transit constipation.	PVD		20	NPDR	FALSE	NPDR	NPDR	OD	Periphery	NPDR_Periphery	358	min	Water	15.5	ul	129	ng/ul	7.1
sample_58	58	21	male	62	63.2687	19 years	19	years	insulin	clonidine, fluoxetine, gabapentin, hydrocodone, simvastatin, omeprazole, lisinopril, cephalexin, tirosint, diltiazem, hydralazine	type I diabetes, hypothyroidism, high cholesterol, hypertension, neuropathy	glaucoma suspect due to large cups, but not frank glaucoma		43	NPDR	FALSE	NPDR	NPDR	OS	Periphery	NPDR_Periphery	329	min	Water	27.4	ul	73	ng/ul	8.2
sample_59	59	13	male	78		>10 years	10	years	Humalog, Lantus	aspirin, fish oil, Lasix, Lipitor, lisinopril, warfarin, metolazone	kidney failure, hypertension, melanoma, heart bypass	pseudophakia, epiretinal membrane		35	NPDR	FALSE	NPDR	NPDR	OD	Periphery	NPDR_Periphery	309	min	Water	20	ul	100	ng/ul	6.2
sample_60	60	17	male	90	26.254	unknown		years	glimepiride	atenolol, atorvastatin, Azor, furosemide	type II diabetes mellitus, acute pulmonary edema, renal failure, gastrointestinal hemorrhage,	lattice degeneration, vitreous detachment, mild ARMD, pseudophakia		53	NPDR	FALSE	NPDR	NPDR	OS	Periphery	NPDR_Periphery	297	min	Water	26.7	ul	8.4	ng/ul	7.5
sample_61	61	26	male	69	39.1	>25 years	25	years	insulin	pamelor, lisonopril, furosemide, glyburide, atenolol, paxil, insulin	cellulitis with Staph Aureus sepsis, hypertension, coronary atery disease, anxiety, CHF	focal grid laser to macula, IOL, YAG, PVD		43	NPDR	TRUE	NPDR/PDR + DME	NPDR + DME	OD	Macula	DME_Macula	320	min	Water	15.38	ul	130	ng/ul	4.7
sample_62	62	9	female	77	42.038	>15 years	15	years	Insulin, glipizide,	celebrex, ASA, trazodone, norvascstatin, lipitor, hydorchlorothiazide	hypertension, heart attack, acid reflux, congestive heart failure, COPD, aortic valve stenosis	AION, pseudophakia		43	NPDR	TRUE	NPDR/PDR + DME	NPDR + DME	OS	Macula	DME_Macula	149	min	Water	12.3	ul	163	ng/ul	7.3
sample_63	63	5	female	73	33.5	34 years	34	years	insulin	oxygen, ASA, synthroid, diatx, allopurinol, tums, iron, BiPAP, vit E, fish oil, benicar, allegra	heart failure, cor pumonale and oxygen support, lower extremity lymphedema	repeated pan retinal photocoagulation		65	PDR	TRUE	NPDR/PDR + DME	PDR + DME	OD	Macula	DME_Macula	312	min	Water	22.22	ul	90	ng/ul	7.6
sample_64	64	5	female	73	33.5	34 years	34	years	insulin	oxygen, ASA, synthroid, diatx, allopurinol, tums, iron, BiPAP, vit E, fish oil, benicar, allegra	heart failure, cor pumonale and oxygen support, lower extremity lymphedema	repeated pan retinal photocoagulation		65	PDR	TRUE	NPDR/PDR + DME	PDR + DME	OS	Macula	DME_Macula	340	min	Water	21.74	ul	92	ng/ul	4.7
sample_65	65	4	female	76	24.3898	23 years, DR 7 years	23	years	insulin	Diovan, Norvasc, plavix, lopressor, foltex, furosemide, pyridoxine, iron, calcium carbonate, diltiazem, allegra, protoniox, levaquin, coumadin, flagyl	DM type 1, stroke, Afib, hpertension, renal disease, peripheral neuropathy, ischemic bowl disease	focal macula laser, IOL	drusen	35	NPDR	TRUE	NPDR/PDR + DME	NPDR + DME	OD	Macula	DME_Macula	330	min	Water	28.57	ul	70	ng/ul	7.2
sample_66	66	4	female	76	24.3898	23 years, DR 7 years	23	years	insulin	Diovan, Norvasc, plavix, lopressor, foltex, furosemide, pyridoxine, iron, calcium carbonate, diltiazem, allegra, protoniox, levaquin, coumadin, flagyl	DM type 1, stroke, Afib, hpertension, renal disease, peripheral neuropathy, ischemic bowl disease	grid focal laser, IOL	drusen	35	NPDR	TRUE	NPDR/PDR + DME	NPDR + DME	OS	Macula	DME_Macula	350	min	Water	45.45	ul	44	ng/ul	7.5
sample_67	67	29	male	59	30.2108	unkown		years	insulin	unknown	CAD, CHF, COPD, DM type II, HTN, hyperlipidemia, cor pulmonae, ischemic heart disease, morbid obesity, MI, obstructive sleep apnea, tobacco use			35	NPDR	TRUE	NPDR/PDR + DME	NPDR + DME	OS	Macula	DME_Macula	280	min	Water	34.5	ul	58	ng/ul	7.7
sample_68	68	14	female	61	59.3016	>17 years	17	years	Lantus, Humalog	allopurinol, ammonium lactate, atorvastatin, diphenhydramine, fuosemide, metoprolol	endometrial cancer, septic shock, acute renal failure, hypertension, heart failure, a fib, diabetes type II, GERD,tinnitus, obesity,	pan retinal photocoagulation		65	PDR	TRUE	NPDR/PDR + DME	PDR + DME	OS	Macula	DME_Macula	345	min	Water	15.87	ul	126	ng/ul	5.3
sample_69	69	8	female	82	34.1847	unkown, but >8 years	8	years	metformin, humalog, lantus	Aggrenox, amitriptyline, avapro, furosemide, lipitor, metoprolol, omeprazole, systane	hypertension, GERD, hyperlipidimia	DME OD>OS	mild ARMD	43	NPDR	TRUE	NPDR/PDR + DME	NPDR + DME	OD	Macula	DME_Macula	316	min	Water	28.17	ul	71	ng/ul	7.9
sample_70	70	8	female	82	34.1847	unkown, but >8 years	8	years	metformin, humalog, lantus	Aggrenox, amitriptyline, avapro, furosemide, lipitor, metoprolol, omeprazole, systane	hypertension, GERD, hyperlipidimia	DME OD>OS	mild ARMD	35	NPDR	TRUE	NPDR/PDR + DME	NPDR + DME	OS	Macula	DME_Macula	348	min	Water	29.41	ul	68	ng/ul	7.9
sample_71	71	9	female	77	42.038	>15 years	15	years	Insulin, glipizide,	celebrex, ASA, trazodone, norvascstatin, lipitor, hydorchlorothiazide	hypertension, heart attack, acid reflux, congestive heart failure, COPD, aortic valve stenosis			43	NPDR	TRUE	NPDR/PDR + DME	NPDR + DME	OD	Periphery	DME_Periphery	174	min	Water	13.7	ul	146	ng/ul	4.7
sample_72	72	26	male	69	39.1	>25 years	25	years	insulin	pamelor, lisonopril, furosemide, glyburide, atenolol, paxil, insulin	cellulitis with Staph Aureus sepsis, hypertension, coronary atery disease, anxiety, CHF	focal grid laser to macula, IOL, YAG, PVD		43	NPDR	TRUE	NPDR/PDR + DME	NPDR + DME	OS	Periphery	DME_Periphery	295	min	Water	17.09	ul	117	ng/ul	7.6
sample_73	73	5	female	73	33.5	34 years	34	years	insulin	oxygen, ASA, synthroid, diatx, allopurinol, tums, iron, BiPAP, vit E, fish oil, benicar, allegra	heart failure, cor pumonale and oxygen support, lower extremity lymphedema	repeated pan retinal photocoagulation		65	PDR	TRUE	NPDR/PDR + DME	PDR + DME	OD	Periphery	DME_Periphery	312	min	Water	15.27	ul	131	ng/ul	6.7
sample_74	74	9	female	77	42.038	>15 years	15	years	Insulin, glipizide,	celebrex, ASA, trazodone, norvascstatin, lipitor, hydorchlorothiazide	hypertension, heart attack, acid reflux, congestive heart failure, COPD, aortic valve stenosis	AION, pseudophakia		43	NPDR	TRUE	NPDR/PDR + DME	NPDR + DME	OS	Periphery	DME_Periphery	149	min	Water	27.78	ul	72	ng/ul	7.5
sample_75	75	4	female	76	24.3898	23 years, DR 7 years	23	years	insulin	Diovan, Norvasc, plavix, lopressor, foltex, furosemide, pyridoxine, iron, calcium carbonate, diltiazem, allegra, protoniox, levaquin, coumadin, flagyl	DM type 1, stroke, Afib, hpertension, renal disease, peripheral neuropathy, ischemic bowl disease	focal macula laser, IOL	drusen	35	NPDR	TRUE	NPDR/PDR + DME	NPDR + DME	OD	Periphery	DME_Periphery	330	min	Water	21.28	ul	94	ng/ul	8.2
sample_76	76	4	female	76	24.3898	23 years, DR 7 years	23	years	insulin	Diovan, Norvasc, plavix, lopressor, foltex, furosemide, pyridoxine, iron, calcium carbonate, diltiazem, allegra, protoniox, levaquin, coumadin, flagyl	DM type 1, stroke, Afib, hpertension, renal disease, peripheral neuropathy, ischemic bowl disease	grid focal laser, IOL	drusen	35	NPDR	TRUE	NPDR/PDR + DME	NPDR + DME	OS	Periphery	DME_Periphery	350	min	Water	23.26	ul	86	ng/ul	8
sample_77	77	27	female	84		7 years	7	years	glipizide	furosemide, verapamil, xopenex, crestor, nexium, venlafaxine, prednisone, hydralazine, azithromysin, spriva, levothyroxine	pulmonary hypertension, hypothyroidism, diabetes type II, reflux disease, COPD, mastectomy due to breast cancer, knee replacement, Gravesâ€™ disease, depression	glaucoma suspect		35	NPDR	TRUE	NPDR/PDR + DME	NPDR + DME	OD	Periphery	DME_Periphery	230	min	Water	29.41	ul	68	ng/ul	4
sample_78	78	14	female	61	59.3016	>17 years	17	years	Lantus, Humalog	allopurinol, ammonium lactate, atorvastatin, diphenhydramine, fuosemide, metoprolol	endometrial cancer, septic shock, acute renal failure, hypertension, heart failure, a fib, diabetes type II, GERD,tinnitus, obesity,	pan retinal photocoagulation		65	PDR	TRUE	NPDR/PDR + DME	PDR + DME	OS	Periphery	DME_Periphery	345	min	Water	25.32	ul	79	ng/ul	7.4
sample_79	79	8	female	82	34.1847	unkown, but >8 years	8	years	metformin, humalog, lantus	Aggrenox, amitriptyline, avapro, furosemide, lipitor, metoprolol, omeprazole, systane	hypertension, GERD, hyperlipidimia	DME OD>OS	mild ARMD	43	NPDR	TRUE	NPDR/PDR + DME	NPDR + DME	OD	Periphery	DME_Periphery	316	min	Water	32.79	ul	61	ng/ul	7.3
sample_80	80	8	female	82	34.1847	unkown, but >8 years	8	years	metformin, humalog, lantus	Aggrenox, amitriptyline, avapro, furosemide, lipitor, metoprolol, omeprazole, systane	hypertension, GERD, hyperlipidimia	DME OD>OS	mild ARMD	35	NPDR	TRUE	NPDR/PDR + DME	NPDR + DME	OS	Periphery	DME_Periphery	348	min	Water	20.41	ul	98	ng/ul	7.9
